# Supplementary material for: Availability and Stock Levels of Essential Medicines in Government Healthcare Institutions of Different Settings in a Rural District in Sri Lanka: a multicentre cross-sectional study
Source: Research Square preprint supplement (doi:10.21203/rs.3.rs-5051616/v1), 2024-10-10
Supplement: Supplementary file 1 [file 42e46fb20628c0811fdf479a.docx]

Supplementary data

Table A1: Stock-out duration of the selected EMs in days within the last 12 months

| **Disease condition** | **Entitled Levels of GHCIs** | **Key medicine to treat common conditions** | **Number of days out of stock per year** | | | | | |
| --- | --- | --- | --- | --- | --- | --- | --- | --- |
|  |  |  | DGH | BH -B | DH -A | DH -B | DH -C | PMCU |
| Anti-thrombotic | 1, 2, 3, 4 | Aspirin tab. 75 mg, 100 mg, 150 mg | 30 | 33 | 60 | 90 | 60 | 0 |
| Rheumatoid diseases | 1, 2, 3, 4 | Diclofenac sodium tab. 50 mg | 20 | 0 | 0 | 0 | 0 | 0 |
| 1, 2, 3, 4 | Paracetamol tab. 500 mg | 0 | 28 | 0 | 0 | 0 | 0 |
| 1, 2, 3, 4 | Paracetamol oral liquid 120 mg/5 mL | 60 | 12 | 30 | 30 | 86 | 80 |
| Worm infestation | 1, 2, 3, 4 | Mebendazole tab 100 mg | 0 | 24 | 0 | 0 | 0 | 0 |
| Respiratory tract infections | 1, 2, 3, 4 | Amoxycillin cap 250 mg, 500 mg | 152 | 63 | 120 | 95 | 62 | 7 |
| 1, 2, 3, 4 | Amoxicillin oral susp.125 mg/5 mL,100 mL bot. | 197 | 54 | 77 | 32 | 43 | 47 |
| Common colds, rhinitis | 1, 2, 3, 4 | Chlorphenamine maleate tab 4 mg | 0 | 0 | 0 | 65 | 18 | 0 |
| 1, 2, 3, 4 | Chlorpheniramine oral solu.2 mg/5 mL, 60 mL bot. | 0 | 38 | 38 | 35 | 79 | 52 |
| Asthma | 1, 2, 3, 4 | Salbutamol tab.2 mg | 0 | 5 | 5 | 42 | 0 | 0 |
| 1, 2, 3, 4 | Salbutamol MDI 100 mcg, 50 mcg per dose | 0 | 28 | 10 | 35 | 8 | 0 |
| 3, 4 | Ipratropium bromide MDI 20 mcg | 99 | 87 | *365 | *365 | *365 | *365 |
| 3, 4 | Ipratropium bromide DPC 40 mcg | 0 | 0 | *0 | *0 | *365 | *0 |
| 1, 2, 3, 4 | Beclomethasone DPC 200 mcg |  | 0 | 120 | 0 | 310 | 0 |
| 1, 2, 3, 4 | Beclomethasone MDI 50 mcg, 200 doses | 346 | 163 | 0 | 0 | 365 | 365 |
| 1, 2, 3, 4 | Beclomethasone MDI 100 mcg, 200 doses | 165 | 87 | 30 | 62 | 165 | 65 |
| 1, 2, 3, 4 | Beclomethasone MDI 250 mcg, 200 doses | 248 | 66 | 0 | 95 | 10 | 0 |
| 1, 2, 3, 4 | Prednisolone tab. 5 mg | 0 | 42 | 8 | 25 | 55 | 0 |
| Diarrhea | 1, 2, 3, 4 | Oral Rehydration Salt (ORS) | 0 | 0 | 0 | 0 | 0 | 0 |
| Gastritis/GI ulcers | 2, 3, 4 | Omeprazole cap. 20 mg | 0 | 0 | 0 | 0 | 0 | *0 |
| Nausea, Vomiting | 1, 2, 3, 4 | Domperidone tab. 10 mg | 40 | 55 | 0 | 65 | 22 | 0 |
|  | 1, 2, 3, 4 | Domperidone syrup 5 mg/ 5 mL | 122 | 13 | 0 | 20 | 30 | 0 |
| UTI | 1, 2, 3, 4 | Nitrofurantoin tab. 50 mg | 40 | 0 | 50 | 0 | 0 | 120 |
| Skin infection | 1, 2, 3, 4 | Miconazole cream 2% | 72 | 28 | 0 | 0 | 0 | 0 |
| Inflammation and pruritus | 1, 2, 3, 4 | Hydrocortisone cream or ointment 1% | 157 | 14 | 105 | 38 | 4 | 35 |
| Anemia | 1, 2, 3, 4 | Ferrous sulfate tab. 200 mg | 122 | 0 | 50 | 0 | 7 | 30 |
| 1, 2, 3, 4 | Folic acid tab. 1 mg | 0 | 0 | 0 | 0 | 0 | 0 |
| 1, 2, 3, 4 | Iron drops 100 mg/ 5mL, in 15 mL dropper | 95 | 0 | 0 | 0 | 365 | 0 |
| 1, 2, 3, 4 | Iron syr. 25 mg/ mL in bot. | 49 | 0 | 330 | 0 | 365 | 365 |
| Eye infections | 1, 2, 3, 4 | Ciprofloxacin eye drops 0.3% | 53 | 90 | 36 | 65 | 130 | 70 |
| Ear infections | 1, 2, 3, 4 | Ciprofloxacin ear drops 0.3% | 53 | 0 | 0 | 61 | 365 | 70 |
| Vertigo | 1, 2, 3, 4 | Prochlorperazine tab. 5 mg | 0 | 0 | 0 | 35 | 0 | 0 |
| Diabetics | 1, 2, 3, 4 | Metformin tab. 500 mg | 22 | 0 | 0 | 0 | 19 | 0 |
| Hypertension | 1, 2, 3, 4 | Nifedipine tab. 20 mg | 25 | 0 | 0 | 185 | 63 | 50 |
| 1, 2, 3, 4 | Enalapril tab. 5 mg | 0 | 0 | 120 | 0 | 0 | 0 |
| 1, 2, 3, 4 | Hydrocholorothiazide tab. 25 mg | 0 | 0 | 0 | 0 | 0 | 0 |
| Angina | 1, 2, 3, 4 | Glyceryl trinitrate tab. (sublingual) 500 mcg | 33 | 0 | 0 | 0 | 5 | 0 |
| Heart Failure | 1, 2, 3, 4 | Spironolactone tab. 25 mg | 120 | 0 | 320 | 0 | 0 | 365 |
| Anti-coagulant | 3, 4 | Warfarin tab. 0.5 mg, 1 mg, 3 mg, 5 mg | 6 | 0 | *0 | *0 | *365 | *365 |
| Psychosis | 1, 2, 3, 4 | Fluoxetine cap. 20 mg | 0 | 0 | 0 | 0 | 0 | 365 |
| 2, 3, 4 | Olanzapine tab. 5 mg | 74 | 0 | 0 | 0 | 0 | *365 |
| Epilepsy | 1, 2, 3, 4 | Sodium valproate tab. 100 mg, 200 mg | 100 | 63 | 160 | 68 | 50 | 0 |
| 2, 3, 4 | Sodium valproate syrup 200 mg/ 5 mL | 0 | 42 | 350 | 0 | 365 | *365 |
| 1, 2, 3, 4 | Carbamazepine tab. 200 mg | 0 | 0 | 0 | 0 | 0 | 0 |
|  |  |  |  |  |  |  |  |  |

*DGH*: District General Hospital, *BH-B:* Base Hospital (Type B), *DH-A:* Divisional Hospital (Type A), *DH-B*: Divisional Hospital (Type B)*, DH-C*: Divisional Hospital (Type C)-*, PMCU:* Primary Medical Care Units.

* Not required to present at the GHCIs as per national EML.
